# Supplementary material for: Genetic Diversity Analysis of Onion (Allium cepa L.) from the Arid Region of Tunisia Using Phenotypic Traits and SSR Markers
Source: MDPI journal article supplement (doi:10.3390/horticulturae9101098), 2023-10-03
Supplement: s1 [file s1]

**Table S1:** Results of Pairwise Population Fst Analysis

Fst Calculated Via Frequency Option  
No. Samples 135 and No. Pops 23

| A                       | B      | C      | D      | E      | F      | G      | H      | I      | J       | K       | L       | M       | N       | O       | P       | Q       | R       | S       | T       | U       | V       | W       |       |       |   |
|-------------------------|--------|--------|--------|--------|--------|--------|--------|--------|---------|---------|---------|---------|---------|---------|---------|---------|---------|---------|---------|---------|---------|---------|-------|-------|---|
| Acce-1                  | Acce-2 | Acce-3 | Acce-4 | Acce-5 | Acce-6 | Acce-7 | Acce-8 | Acce-9 | Acce-10 | Acce-11 | Acce-12 | Acce-13 | Acce-14 | Acce-15 | Acce-16 | Acce-17 | Acce-18 | Acce-19 | Acce-20 | Acce-21 | Acce-22 | Acce-23 |       |       |   |
| e Population Fst Values |        |        |        |        |        |        |        |        |         |         |         |         |         |         |         |         |         |         |         |         |         |         |       |       |   |
|                         | A      | B      | C      | D      | E      | F      | G      | H      | I       | J       | K       | L       | M       | N       | O       | P       | Q       | R       | S       | T       | U       | V       | W     |       |   |
| A                       |        | 0,000  |        |        |        |        |        |        |         |         |         |         |         |         |         |         |         |         |         |         |         |         | A     |       |   |
| B                       |        |        | 0,000  |        |        |        |        |        |         |         |         |         |         |         |         |         |         |         |         |         |         |         | B     |       |   |
| C                       |        |        |        | 0,000  |        |        |        |        |         |         |         |         |         |         |         |         |         |         |         |         |         |         | C     |       |   |
| D                       |        |        |        |        | 0,000  |        |        |        |         |         |         |         |         |         |         |         |         |         |         |         |         |         | D     |       |   |
| E                       |        |        |        |        |        | 0,000  |        |        |         |         |         |         |         |         |         |         |         |         |         |         |         |         | E     |       |   |
| F                       |        |        |        |        |        |        | 0,000  |        |         |         |         |         |         |         |         |         |         |         |         |         |         |         | F     |       |   |
| G                       |        |        |        |        |        |        |        | 0,000  |         |         |         |         |         |         |         |         |         |         |         |         |         |         | G     |       |   |
| H                       |        |        |        |        |        |        |        |        | 0,000   |         |         |         |         |         |         |         |         |         |         |         |         |         | H     |       |   |
| I                       |        |        |        |        |        |        |        |        |         | 0,000   |         |         |         |         |         |         |         |         |         |         |         |         | I     |       |   |
| J                       |        |        |        |        |        |        |        |        |         |         | 0,000   |         |         |         |         |         |         |         |         |         |         |         | J     |       |   |
| K                       |        |        |        |        |        |        |        |        |         |         |         | 0,000   |         |         |         |         |         |         |         |         |         |         | K     |       |   |
| L                       |        |        |        |        |        |        |        |        |         |         |         |         | 0,000   |         |         |         |         |         |         |         |         |         | L     |       |   |
| M                       |        |        |        |        |        |        |        |        |         |         |         |         |         | 0,000   |         |         |         |         |         |         |         |         | M     |       |   |
| N                       |        |        |        |        |        |        |        |        |         |         |         |         |         |         | 0,000   |         |         |         |         |         |         |         | N     |       |   |
| O                       |        |        |        |        |        |        |        |        |         |         |         |         |         |         |         | 0,000   |         |         |         |         |         |         | O     |       |   |
| P                       |        |        |        |        |        |        |        |        |         |         |         |         |         |         |         |         | 0,000   |         |         |         |         |         | P     |       |   |
| Q                       |        |        |        |        |        |        |        |        |         |         |         |         |         |         |         |         |         | 0,000   |         |         |         |         | Q     |       |   |
| R                       |        |        |        |        |        |        |        |        |         |         |         |         |         |         |         |         |         |         | 0,000   |         |         |         | R     |       |   |
| S                       |        |        |        |        |        |        |        |        |         |         |         |         |         |         |         |         |         |         |         | 0,000   |         |         | S     |       |   |
| T                       |        |        |        |        |        |        |        |        |         |         |         |         |         |         |         |         |         |         |         |         | 0,000   |         | T     |       |   |
| U                       |        |        |        |        |        |        |        |        |         |         |         |         |         |         |         |         |         |         |         |         |         | 0,000   | U     |       |   |
| V                       |        |        |        |        |        |        |        |        |         |         |         |         |         |         |         |         |         |         |         |         |         |         | 0,000 | V     |   |
| W                       |        |        |        |        |        |        |        |        |         |         |         |         |         |         |         |         |         |         |         |         |         |         |       | 0,000 | W |
|                         | A      | B      | C      | D      | E      | F      | G      | H      | I       | J       | K       | L       | M       | N       | O       | P       | Q       | R       | S       | T       | U       | V       | W     |       |   |

Fst: pair-wise genetic differentiation

**Table S2 : Diversity parameters for the different onion accessions**

| <b>Population</b> | <b>Accession<br/>N°</b> | <b>% P</b> | <b>Number<br/>alleles</b> | <b>Ne</b> | <b>I</b> | <b>No. Private<br/>Alleles</b> | <b>Ho</b> | <b>He</b> | <b>UHe</b> |
|-------------------|-------------------------|------------|---------------------------|-----------|----------|--------------------------------|-----------|-----------|------------|
| <b>A</b>          | Acce-1                  | 100,00%    | 2,800                     | 2,106     | 0,814    | 1                              | 0,386     | 0,499     | 0,555      |
| <b>B</b>          | Acce-2                  | 70,00%     | 1,800                     | 1,550     | 0,530    | 1                              | 0,372     | 0,338     | 0,366      |
| <b>C</b>          | Acce-3                  | 80,00%     | 2,200                     | 1,778     | 0,635    | 0                              | 0,482     | 0,400     | 0,445      |
| <b>D</b>          | Acce-4                  | 80,00%     | 2,100                     | 1,673     | 0,605    | 0                              | 0,368     | 0,387     | 0,436      |
| <b>E</b>          | Acce-5                  | 80,00%     | 2,200                     | 1,664     | 0,552    | 0                              | 0,450     | 0,333     | 0,369      |
| <b>F</b>          | Acce-6                  | 80,00%     | 2,200                     | 1,688     | 0,603    | 0                              | 0,397     | 0,376     | 0,406      |
| <b>G</b>          | Acce-7                  | 90,00%     | 2,300                     | 1,677     | 0,615    | 0                              | 0,364     | 0,369     | 0,415      |
| <b>H</b>          | Acce-8                  | 90,00%     | 2,200                     | 1,848     | 0,657    | 0                              | 0,482     | 0,416     | 0,466      |
| <b>I</b>          | Acce-9                  | 90,00%     | 2,300                     | 1,924     | 0,668    | 0                              | 0,317     | 0,436     | 0,496      |
| <b>J</b>          | Acce-10                 | 70,00%     | 2,200                     | 1,843     | 0,560    | 0                              | 0,379     | 0,337     | 0,390      |
| <b>K</b>          | Acce-11                 | 90,00%     | 2,300                     | 1,841     | 0,671    | 0                              | 0,412     | 0,417     | 0,453      |
| <b>L</b>          | Acce-12                 | 60,00%     | 1,500                     | 1,305     | 0,394    | 0                              | 0,350     | 0,260     | 0,330      |
| <b>M</b>          | Acce-13                 | 70,00%     | 2,000                     | 1,582     | 0,577    | 1                              | 0,372     | 0,356     | 0,388      |
| <b>N</b>          | Acce-14                 | 70,00%     | 2,000                     | 1,600     | 0,481    | 0                              | 0,360     | 0,306     | 0,335      |
| <b>O</b>          | Acce-15                 | 100,00%    | 2,400                     | 2,060     | 0,742    | 0                              | 0,481     | 0,477     | 0,516      |
| <b>P</b>          | Acce-16                 | 90,00%     | 2,400                     | 2,007     | 0,714    | 0                              | 0,413     | 0,452     | 0,495      |
| <b>Q</b>          | Acce-17                 | 100,00%    | 2,900                     | 2,124     | 0,843    | 0                              | 0,591     | 0,500     | 0,555      |
| <b>R</b>          | Acce-18                 | 90,00%     | 2,500                     | 2,136     | 0,775    | 0                              | 0,510     | 0,490     | 0,533      |
| <b>S</b>          | Acce-19                 | 80,00%     | 1,700                     | 1,547     | 0,550    | 0                              | 0,500     | 0,375     | 0,500      |
| <b>T</b>          | Acce-20                 | 60,00%     | 1,500                     | 1,298     | 0,347    | 0                              | 0,350     | 0,235     | 0,297      |
| <b>U</b>          | Acce-21                 | 50,00%     | 1,500                     | 1,278     | 0,321    | 0                              | 0,317     | 0,210     | 0,257      |
| <b>V</b>          | Acce-22                 | 80,00%     | 1,700                     | 1,620     | 0,530    | 0                              | 0,517     | 0,376     | 0,510      |
| <b>W</b>          | Acce-23                 | 60,00%     | 1,600                     | 1,520     | 0,390    | 0                              | 0,500     | 0,275     | 0,433      |

**Table S3:** Morphological and quality features of the studied onion genotypes (mean  $\pm$  SD), field experiment done at the arid region of South-Tunisia (Gabes oasis)

|         | Bulb diameter<br>(mm)                 | Fresh weight<br>(g)                    | Dry matter content<br>(%)            | Scales<br>number                     | TSS<br>(°Brix)     |
|---------|---------------------------------------|----------------------------------------|--------------------------------------|--------------------------------------|--------------------|
| Acce-1  | 68.96 $\pm$ 5.68 a                    | 142.83 $\pm$ 19.73 c                   | 12.93 $\pm$ 0.79 a                   | 8.67 $\pm$ 0.58 b                    | 11.33 $\pm$ 0.29 b |
| Acce-2  | 83.92 $\pm$ 6.47 a                    | 389.67 $\pm$ 22.14 a                   | 6.88 $\pm$ 0.69 c                    | <b>11.67 <math>\pm</math> 0.58 a</b> | 14.83 $\pm$ 0.76 a |
| Acce-3  | <b>93.82 <math>\pm</math> 14.07 a</b> | 325.01 $\pm$ 12.53 a                   | 12.54 $\pm$ 0.72 a                   | 10.67 $\pm$ 0.58 a                   | 13.83 $\pm$ 0.29 b |
| Acce-4  | 79.37 $\pm$ 5.45 a                    | 244.67 $\pm$ 10.54 b                   | 9.54 $\pm$ 0.36 b                    | 6.67 $\pm$ 1.15 c                    | 15.33 $\pm$ 1.15 a |
| Acce-5  | 91.83 $\pm$ 5.56 a                    | 359.17 $\pm$ 30.62 a                   | 11.48 $\pm$ 2.41 a                   | 8.67 $\pm$ 0.58 b                    | 10.67 $\pm$ 2.08 c |
| Acce-6  | 86.01 $\pm$ 6.62 a                    | 268.33 $\pm$ 38.35 b                   | 9.16 $\pm$ 1.12 b                    | 10.00 $\pm$ 0.00 a                   | 8.51 $\pm$ 1.32 d  |
| Acce-7  | 91.55 $\pm$ 9.42 a                    | 289.52 $\pm$ 76.29 b                   | 7.50 $\pm$ 1.46 c                    | 9.33 $\pm$ 0.58 b                    | 8.85 $\pm$ 1.03 d  |
| Acce-8  | 83.31 $\pm$ 3.09 a                    | 268.00 $\pm$ 52.23 b                   | 10.22 $\pm$ 1.26 b                   | 8.00 $\pm$ 1.00 b                    | 10.33 $\pm$ 0.76 c |
| Acce-9  | 88.68 $\pm$ 14.4 a                    | 258.33 $\pm$ 54.21 b                   | 9.62 $\pm$ 0.54 b                    | 10.33 $\pm$ 0.58 a                   | 12.08 $\pm$ 1.18 b |
| Acce-10 | 86.92 $\pm$ 12.67 a                   | 307.17 $\pm$ 69.28 a                   | 9.37 $\pm$ 2.06 b                    | 10.33 $\pm$ 1.15 a                   | 16.5 $\pm$ 0.87 a  |
| Acce-11 | 72.45 $\pm$ 11.10 a                   | 111.67 $\pm$ 15.04 c                   | 13.05 $\pm$ 1.86 a                   | 10.33 $\pm$ 0.58 a                   | 9.67 $\pm$ 0.58 c  |
| Acce-12 | 48.23 $\pm$ 6.37 c                    | 61.25 $\pm$ 9.88 d                     | 10.11 $\pm$ 0.52 b                   | 7.00 $\pm$ 0.00 c                    | 14.47 $\pm$ 0.95 a |
| Acce-13 | 74.18 $\pm$ 3.82 a                    | 170.67 $\pm$ 22.7 c                    | 10.03 $\pm$ 1.50 b                   | 9.67 $\pm$ 0.58 b                    | 9.63 $\pm$ 1.03 c  |
| Acce-14 | 53.29 $\pm$ 9.94 b                    | 57.67 $\pm$ 8.55 d                     | 13.27 $\pm$ 0.61 a                   | 7.00 $\pm$ 0.00 c                    | 12.00 $\pm$ 1.00 b |
| Acce-15 | 64.66 $\pm$ 2.17 b                    | 117.60 $\pm$ 16.98 c                   | 10.54 $\pm$ 0.69 b                   | 7.33 $\pm$ 0.58 c                    | 13.85 $\pm$ 1.99 b |
| Acce-16 | 75.62 $\pm$ 3.55 a                    | 181.33 $\pm$ 40.32 c                   | 11.08 $\pm$ 2.32 a                   | 10.00 $\pm$ 1.00 a                   | 7.08 $\pm$ 0.14 d  |
| Acce-17 | 93.41 $\pm$ 10.67 a                   | <b>391.33 <math>\pm</math> 65.62 a</b> | 12.65 $\pm$ 2.05 a                   | 11.33 $\pm$ 1.53 a                   | 9.51 $\pm$ 1.32 c  |
| Acce-18 | 75.41 $\pm$ 8.27 a                    | 180.51 $\pm$ 1.80 c                    | 12.67 $\pm$ 1.26 a                   | 10.00 $\pm$ 1.00 a                   | 9.83 $\pm$ 1.04 c  |
| Acce-19 | 93.11 $\pm$ 12.99 a                   | 289.83 $\pm$ 85.99 b                   | <b>13.47 <math>\pm</math> 1.63 a</b> | 7.67 $\pm$ 1.53 c                    | 8.51 $\pm$ 0.50 d  |

**Table S4:** Morphological and quality features of the studied onion genotypes (mean  $\pm$  SD), field experiment done at the semi-arid region of Centre-East Tunisia (Sahline station)

|         | Bulb diameter<br>(cm)            | Fresh weight<br>(g)                   | Dry matter content<br>(%)         | Scales<br>number                  |
|---------|----------------------------------|---------------------------------------|-----------------------------------|-----------------------------------|
| Acce-1  | 8.30 $\pm$ 0.55a                 | 250.00 $\pm$ 10.00c                   | 12.03 $\pm$ 0.20a                 | 10.34 $\pm$ 0.28c                 |
| Acce-2  | 7.20 $\pm$ 0.75b                 | 235.00 $\pm$ 15.00c                   | 12.70 $\pm$ 0.32a                 | 8.34 $\pm$ 0.25e                  |
| Acce-3  | 5.53 $\pm$ 0.23                  | 176.67 $\pm$ 7.64d                    | 12.36 $\pm$ 0.15a                 | 9.35 $\pm$ 0.23e                  |
| Acce-4  | 6.47 $\pm$ 0.41                  | 185.00 $\pm$ 15.00d                   | 10.75 $\pm$ 0.35                  | 7.33 $\pm$ 0.22f                  |
| Acce-5  | 8.53 $\pm$ 0.15a                 | 281.66 $\pm$ 17.55c                   | 12.10 $\pm$ 0.15a                 | 12.35 $\pm$ 1.22b                 |
| Acce-6  | 8.90 $\pm$ 0.25a                 | 337.00 $\pm$ 15.00b                   | 10.30 $\pm$ 0.25                  | <b>13.00<math>\pm</math>1.25a</b> |
| Acce-7  | <b>9.43<math>\pm</math>0.23a</b> | <b>409.66 <math>\pm</math> 10.01a</b> | <b>12.95<math>\pm</math>0.21a</b> | 12.00 $\pm$ 0.22b                 |
| Acce-8  | 7.30 $\pm$ 0.10b                 | 213.33 $\pm$ 10.41c                   | 11.05 $\pm$ 0.35b                 | 09.00 $\pm$ 0.12e                 |
| Acce-9  | 8.47 $\pm$ 0.25a                 | 224.33 $\pm$ 10.06c                   | 9.20 $\pm$ 0.15c                  | 08.00 $\pm$ 0.15e                 |
| Acce-10 | 9.16 $\pm$ 0.21a                 | 408.33 $\pm$ 10.40a                   | 12.33 $\pm$ 0.05a                 | 12.00 $\pm$ 0.15b                 |
| Acce-11 | 7.83 $\pm$ 1.07b                 | 316.33 $\pm$ 18.71b                   | 10.95 $\pm$ 0.22b                 | 10.00 $\pm$ 0.20d                 |
| Acce-12 | 8.47 $\pm$ 0.55a                 | 259.33 $\pm$ 28.04c                   | 10.45 $\pm$ 0.25b                 | 8.35 $\pm$ 0.10e                  |
| Acce-13 | 8.07 $\pm$ 0.15a                 | 308.33 $\pm$ 18.92b                   | 12.48 $\pm$ 0.35a                 | 12.00 $\pm$ 1.12b                 |
| Acce-14 | 8.23 $\pm$ 0.38a                 | 282.56 $\pm$ 12.37c                   | 9.15 $\pm$ 0.23c                  | 11.00 $\pm$ 0.12c                 |
| Acce-15 | 8.00 $\pm$ 0.46a                 | 290.00 $\pm$ 13.22c                   | 12.00 $\pm$ 0.15a                 | 11.00 $\pm$ 0.25c                 |
| Acce-16 | 7.70 $\pm$ 0.35b                 | 296.66 $\pm$ 07.63c                   | 12.50 $\pm$ 0.15a                 | 10.75 $\pm$ 0.25c                 |
| Acce-17 | 7.23 $\pm$ 0.21b                 | 276.66 $\pm$ 10.40c                   | 10.00 $\pm$ 0.05c                 | 10.00 $\pm$ 0.10c                 |
| Acce-18 | 7.97 $\pm$ 0.22b                 | 291.66 $\pm$ 11.28c                   | 11.30 $\pm$ 0.10b                 | 11.00 $\pm$ 0.11c                 |
| Acce-19 | 7.70 $\pm$ 0.20b                 | 280.00 $\pm$ 10.00c                   | 10.15 $\pm$ 0.09c                 | 10.00 $\pm$ 0.10d                 |
